# Supplementary material for: Manipulation ordered and close-packed nanoparticle monolayers at air/liquid interface coupling Langmuir-Blodgett and self-assembly techniques
Source: Royal Society of Chemistry journal article supplement (doi:10.1039/b903439k), 2009-01-01
Supplement: b903439k.pdf [file b903439k.pdf]

## Supplementary information

# Manipulation Ordered and Close-Packed Nanoparticle Monolayers at Air/Liquid Interface Coupling Langmuir-Blodgett and Self-assembly Techniques

Hui-Jung Tsai, Yuh-Lang Lee\*

Department of Chemical Engineering  
National Cheng Kung University  
Tainan 70101, Taiwan

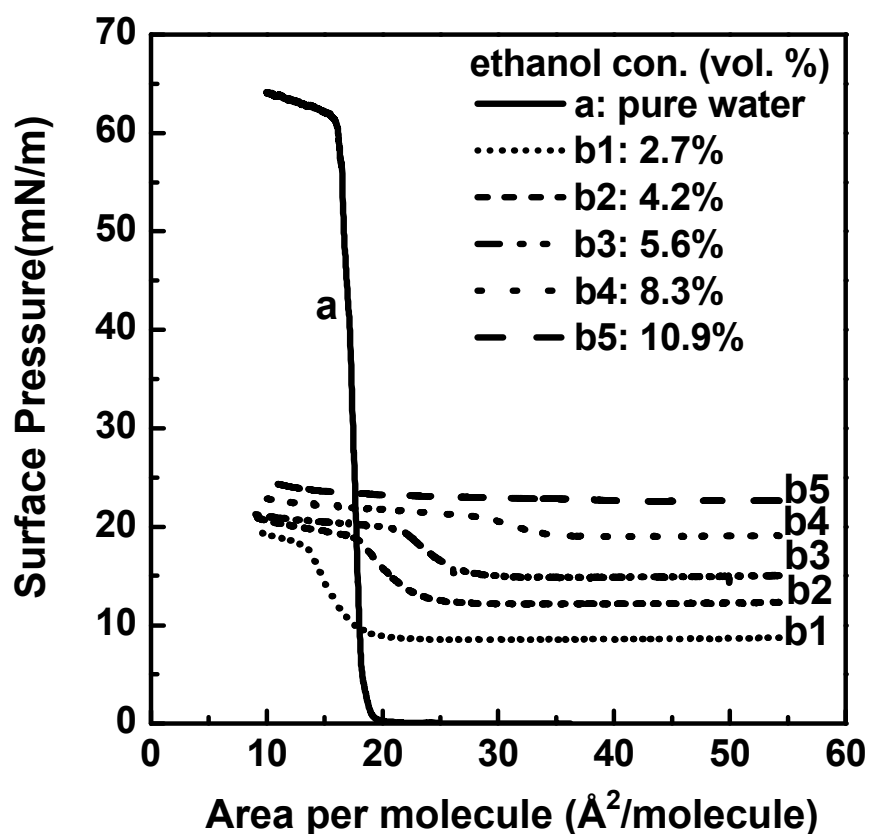

**Figure S1.** Pressure-area ( $\pi$ -A) isotherms of ODA monolayers on pure water (trace **a**), and NP-free aqueous subphases (traces **b1-b5**) containing various concentrations of ethanol.

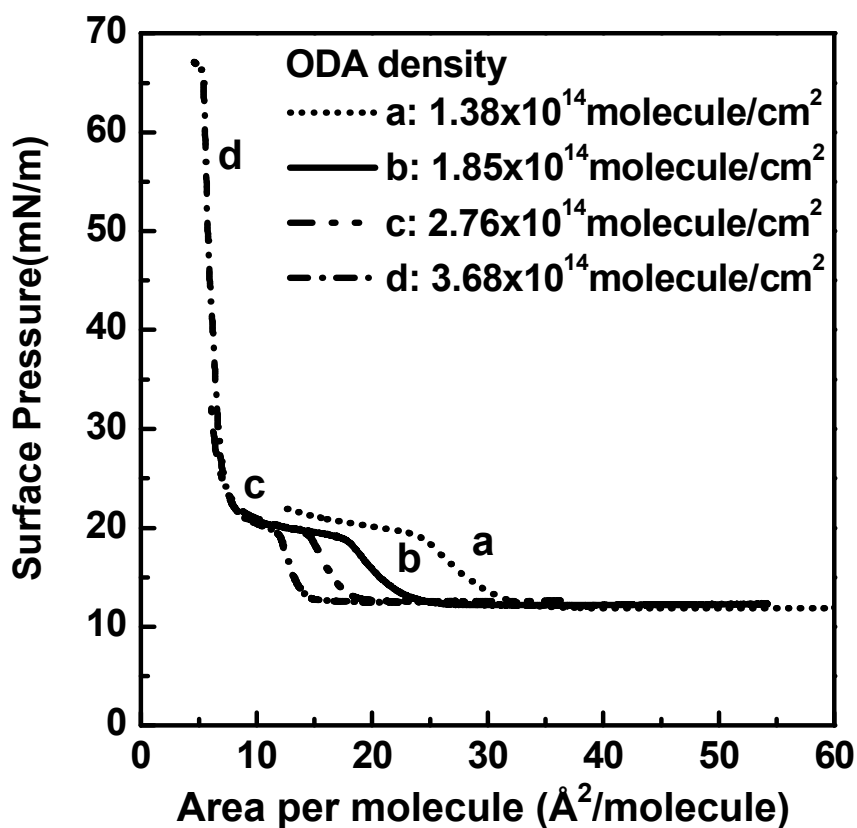

**Figure S2.** Pressure-area ( $\pi$ -A) isotherms of ODA monolayers on NP-free aqueous solution containing 4.2 vol% ethanol. Various quantities of ODA molecules were spread on the subphase.
